# Supplementary figures and images for: Cell-compatible hydrogels based on a multifunctional crosslinker with tunable stiffness for tissue engineering
Source: Royal Society of Chemistry journal article supplement (doi:10.1039/c2jm34862d), 2012-01-01

## Supplemental data

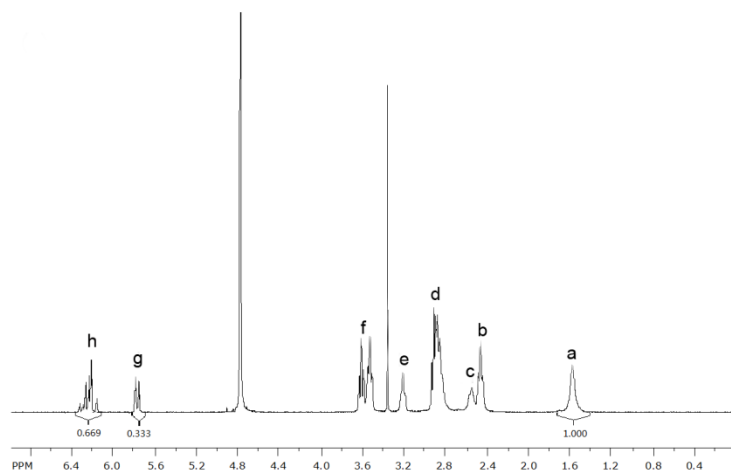

Figure S1 <sup>1</sup>H NMR spectrum of the PAA crosslinker.

Supplement: c2jm34862d.pdf [file c2jm34862d.pdf]
